# Supplementary material for: Dissociation between the critical role of ClpB of Francisella tularensis for the heat shock response and the DnaK interaction and its important role for efficient type VI secretion and bacterial virulence
Source: PubMed Central journal article supplement (PMC7182274; doi:10.1371/journal.ppat.1008466), 2020-04-10

S1A Fig: Evolutionary sequence conservation analysis of ClpB proteins

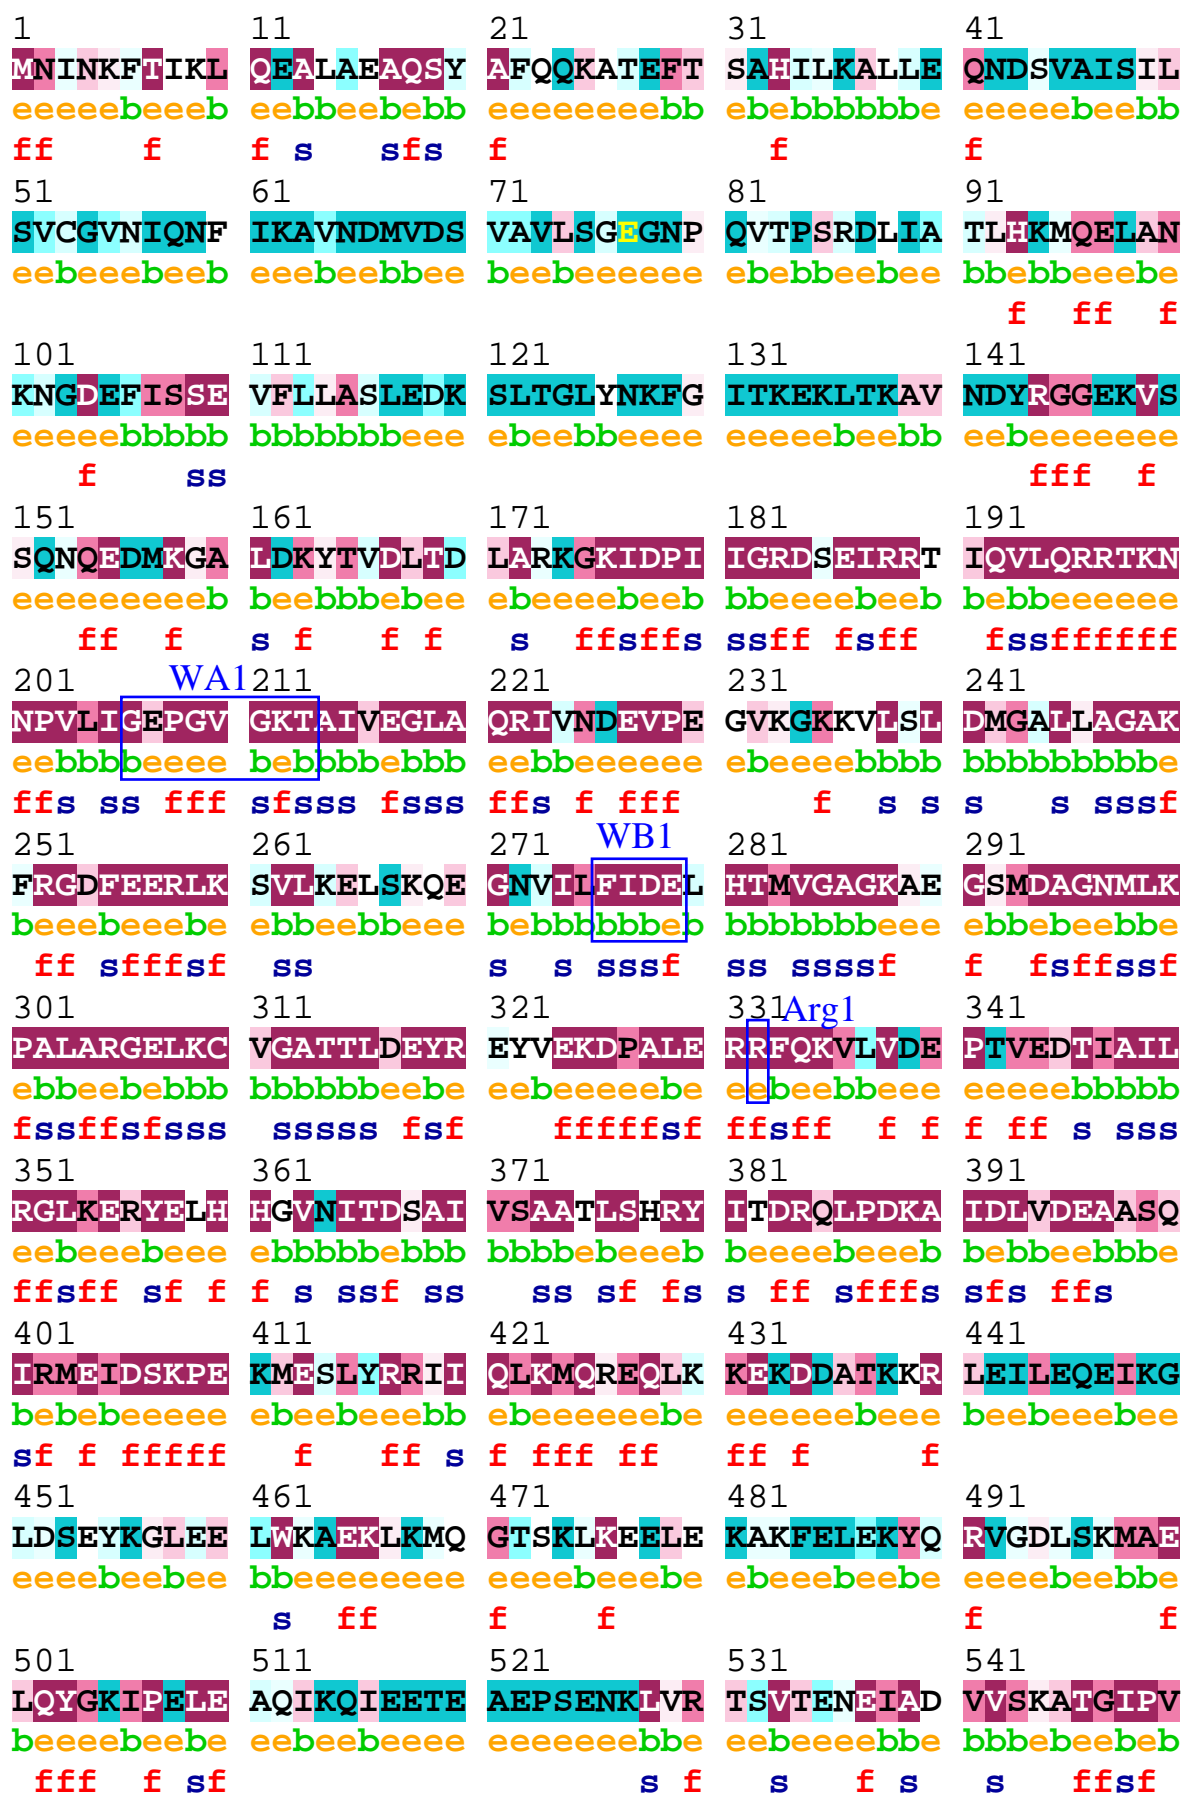

551 561 571 581 591  
 SKMMEGEEKDK LLNMEFLHK RVIGQDQAIK AVSNAVRRSR SGLSDPNRPI  
 bebebebebe bbebebebe ebbebebebe bbbbebebe eebebebebe  
 s f f f s sf s ff fs s ssffsf ffs sf f  
 601 WA2611 621 631 641  
 GSFMFLGPTG VGKTELTKAL AEFLFDDEDA MLRVDMSEFM EKHSVARLIG  
 bbbbbbebe eeeebbb bbbbebebe bbbbbbbbe eebbbbebe  
 sss sssfff fffffs f s s s sf s sssf s fff s fs f  
 651 661 671 WB2 681 691  
 APPGYVGYEQ GGYLTEHVRR KPYSVILLDE VEKAHADVFN ILLQVLDGR  
 bbeebbebe eebeebbe eebbbbbe beeeeebe bbbbebebe  
 ssfffssfff ff sff ff fsss s ff ffff fssf ssfssffsf  
 701 711 721 731 741  
 LTDGQGRVD FKNTVIVMTS NLGSHRIQEM QGDYDTVKD AVMEMVLSHF  
 beeeeeeeee bebbbbbbb bbebebebe eeebebebe bbbbebebe  
 sfffffffff s s s sss s fs sf s s  
 751 Arg2 761 771 781 791  
 RPEFVNRVDD AIVFEPLNKE MITEIAKIQT KRLEKRLADL SIGLEVTTEA  
 eebebebe bbbbbbebe ebebebebe eebebebe ebebebebe  
 ffs ff f ssss s s f f  
 801 811 821 831  
 MDKLADAGFD PVFGARPLKR AIQNNLENPL ALKLLDGEFK  
 bebebebe ebbbebebe bbebebebe bebebebebe  
 f f f ssffsf sf ff s f f

**Legend:**

The conservation scale:

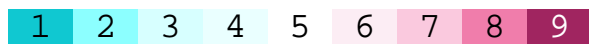

Variable                  Average                  Conserved

- e** - An exposed residue according to the neural-network algorithm.
- b** - A buried residue according to the neural-network algorithm.
- f** - A predicted functional residue (highly conserved and exposed).
- s** - A predicted structural residue (highly conserved and buried).
- x** - Insufficient data - the calculation for this site was performed on less than 10% of the sequences.

S1B Fig: Evolutionary sequence conservation analysis of DnaK proteins

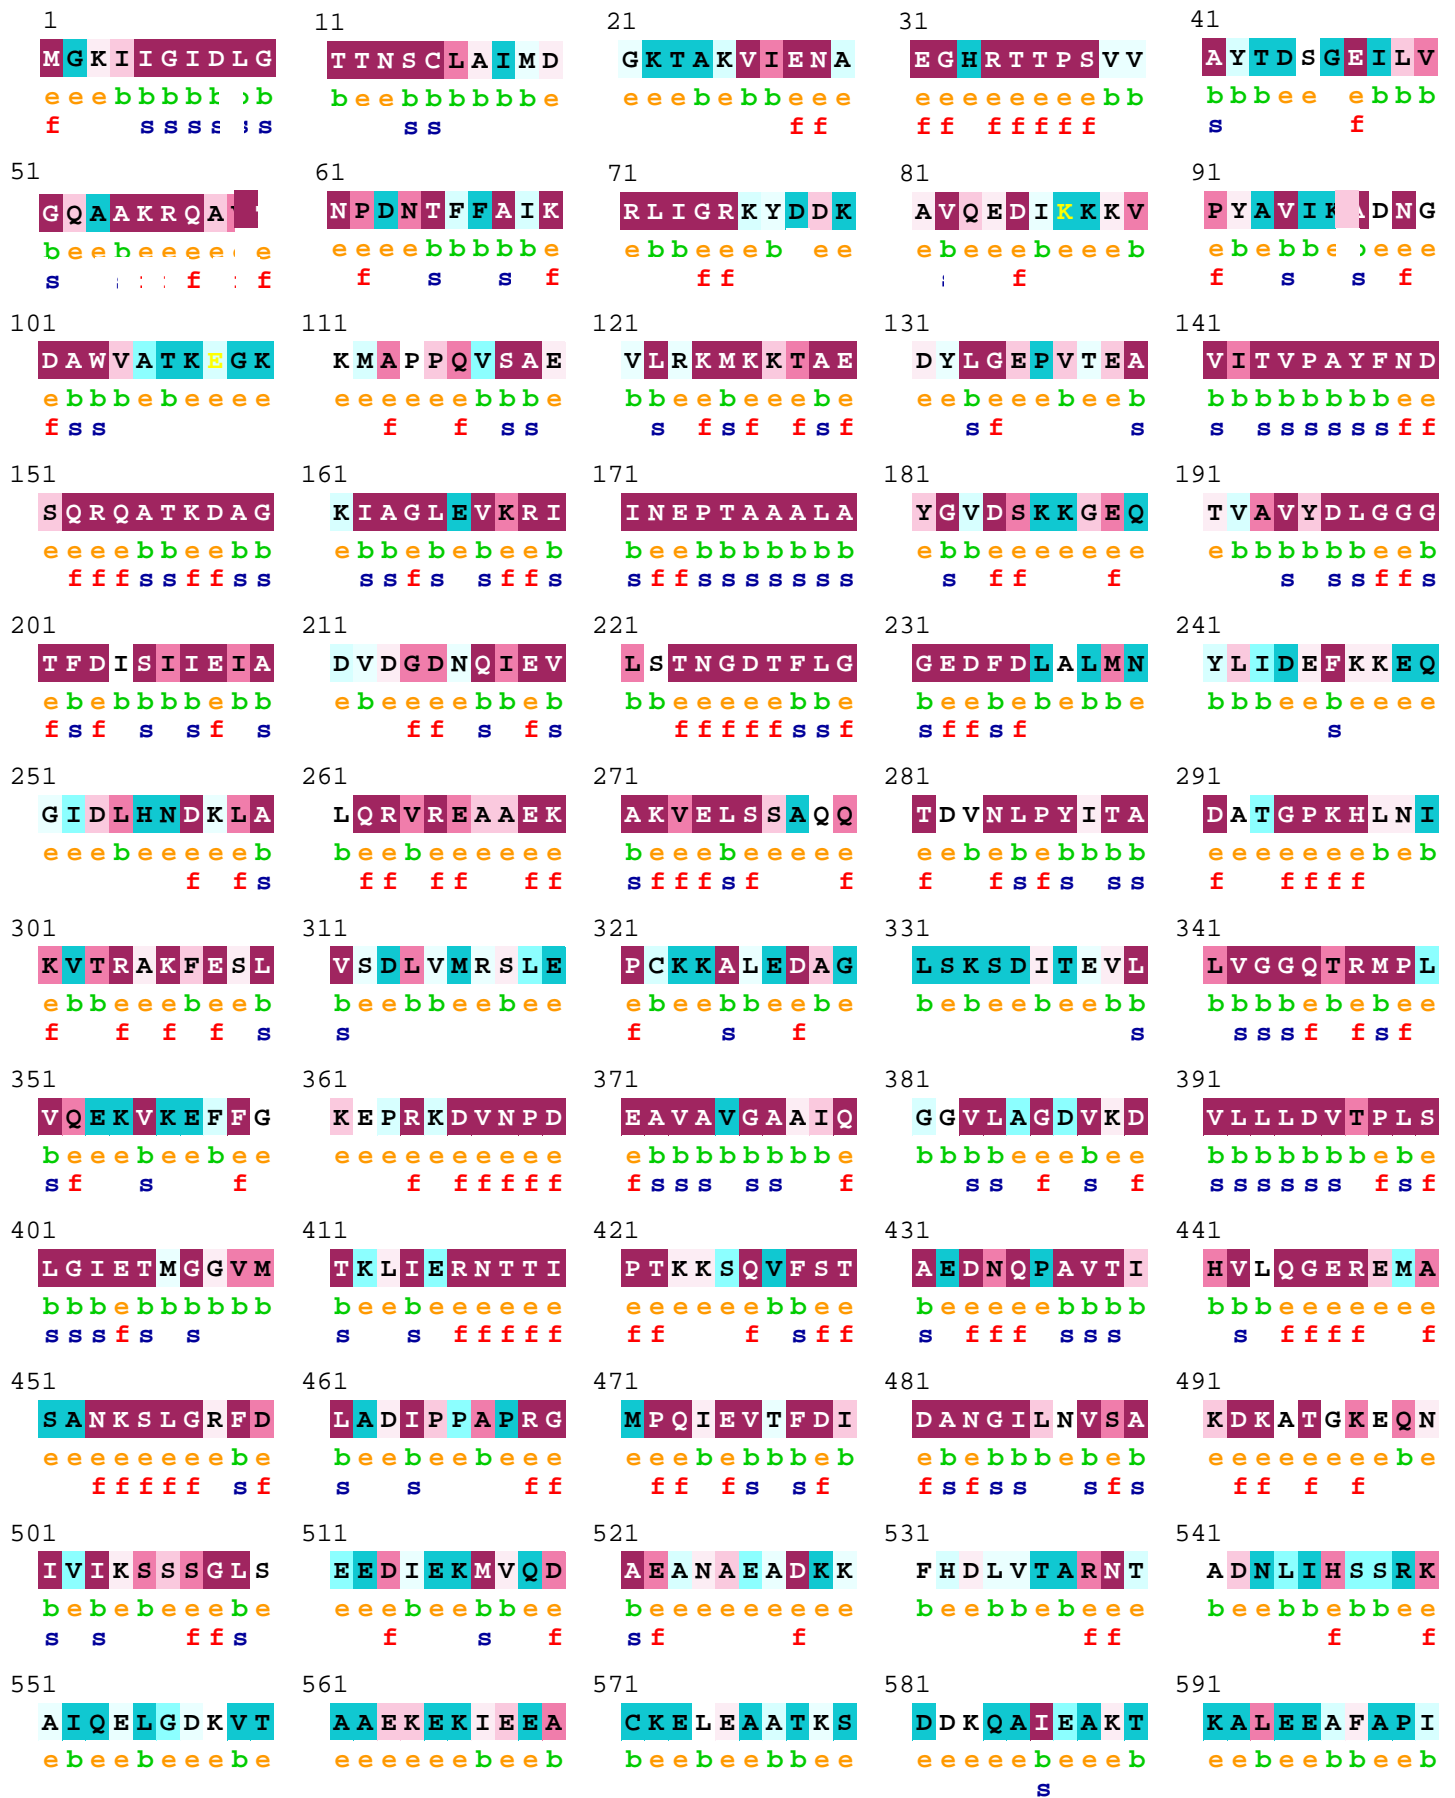

Supplement: ppat.1008466.s001.pdf [file ppat.1008466.s001.pdf]
