# Supplementary material for: Dissociation between the critical role of ClpB of Francisella tularensis for the heat shock response and the DnaK interaction and its important role for efficient type VI secretion and bacterial virulence
Source: PubMed Central journal article supplement (PMC7182274; doi:10.1371/journal.ppat.1008466), 2020-04-10

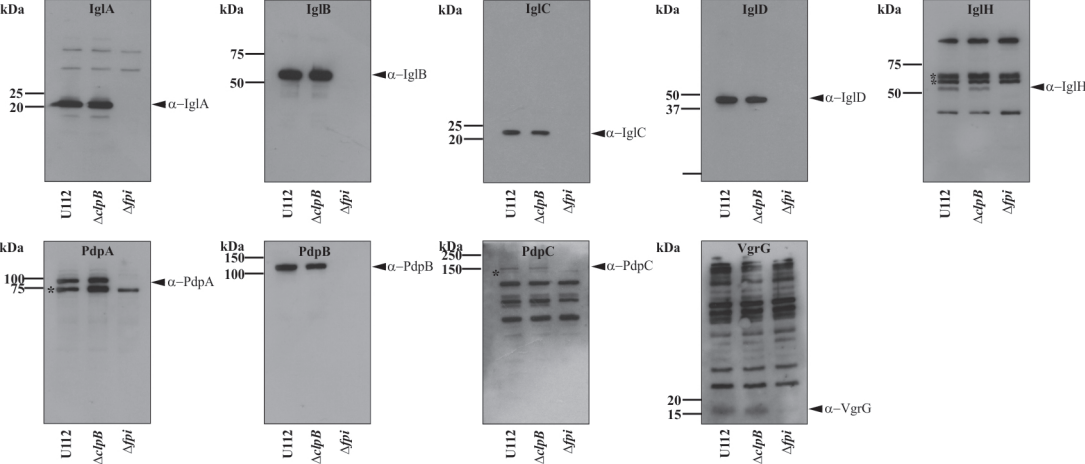

Supplement: ppat.1008466.s006.pdf [file ppat.1008466.s006.pdf]
