# Supplementary material for: Dissociation between the critical role of ClpB of Francisella tularensis for the heat shock response and the DnaK interaction and its important role for efficient type VI secretion and bacterial virulence
Source: PLoS Pathog. 2020 Apr 10;16(4):e1008466. doi: 10.1371/journal.ppat.1008466 (PMC7182274; doi:10.1371/journal.ppat.1008466)
Supplement: S4 Fig — ClpB sequences was retrieved from the NCBI server (https://www.ncbi.nlm.nih.gov/). Sequence alignments of V. cholerae (Accession: AKB07899.1), F. novicida U112 (Accession: AJI61375.1), F. tularensis LVS (Accession: CAJ78535.1), F. tularensis SCHU S4 (Accession: YP_170660.1), E. coli (Accession: BAA16476.1), Mycobacterium tuberculosis (Accession: LB17500.1), and Pseudomonas aeruginosa (Accession: WP_058169183.1) were performed using MAFFT (https://mafft.cbrc.jp/alignment/server/) and the corresponding image generated using the server ESPript 3 (http://espript.ibcp.fr). Secondary structure elements based on the V. cholerae ClpB crystal structure are displayed above the alignment. Start and end of the N-terminal domain is marked with brown arrows. Conserved Walker A (206-GX4GKT-213 and 605-GX4GKT-612) and Walker B (276-Hy2DE-279 and 675-Hy2DE-678) motifs, where X = any amino (aa) and Hy = hydrophobic amino acids are indicated with blue boxes. Conserved Arg residues (R) present in both nucleotide binding domains (Arg-332 and Arg-756) are proposed to serve as Arg fingers and indicated with a blue box, The conserved residue of each of these motifs (highlighted in yellow) was subjected to alanine mutagenesis. (PDF) [file ppat.1008466.s004.pdf]

S4 Fig: Sequence alignment of ClpB proteins

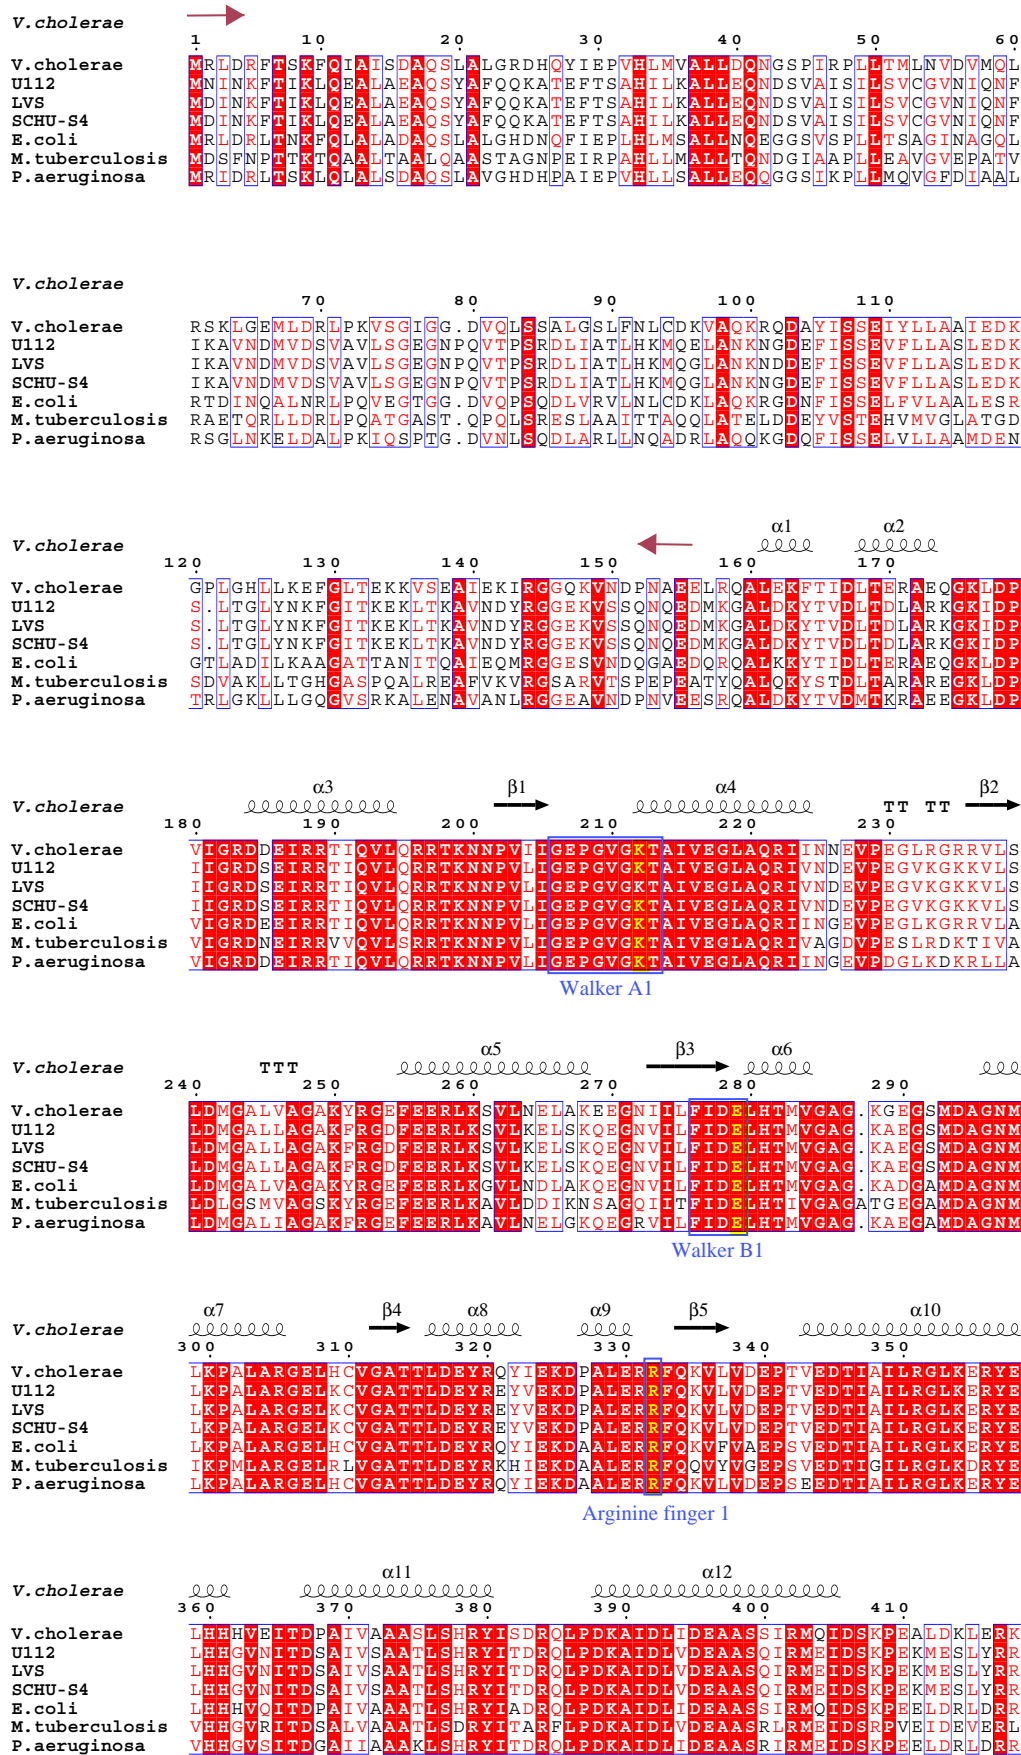

*V. cholerae*

420 430 440 450 460 470

*V. cholerae* I I Q L K T E Q Q A L S N E H D E A S E K R L A I L N E I L Q E K E R D Y A E L E E V W K A E K A A L S G T Q H I K A A  
 U112 I I Q L K M Q R E Q L K K E K D D A T K K R L E I L E Q E I K G L D S E Y K G L E E L W K A E K L K M Q G T S K L K E E  
 LVS I I Q L K M Q R E Q L K K E K D D A T K K R L E I L E Q E I K G L D S E Y K G L E E L W K A E K L K M Q G T S K L K E E  
 SCHU-S4 I I Q L K M Q R E Q L K K E K D D A T K K R L E I L E Q E I K G L D S E Y K G L E E L W K A E K L K M Q G T S K L K E E  
 E. coli I I Q L K L E Q Q A L M K E S D E A S K K R L D M L N E I L S D K E R Q Y S E L E E E W K A E K A S L S G T Q T I K A E  
 M. tuberculosis V R R L E I E M A L S K E D E A S A E L A K L R S E L A D Q K E K L A E L T T R W Q N E K N A I E I V R D L K E Q  
 P. aeruginosa L I Q L K T I E R E A L K K E D D E A T R K R L A K L E E D I V K L E R E Y A D L E E I W K S E K A E V Q G S A Q I Q Q K

*V. cholerae*

480 490 500 510 520 530

*V. cholerae* L E Q A R M D L E V A R R A G D L N R M S E L Q Y G R I P E L E K Q L D L . . A A Q A E M Q E M T L L R N K V T D A E I  
 U112 L E K A K F E L E K Y Q R V G D L S K M A E L Q Y G K I P E L E A Q I K Q I E T E A E P S E N K L V R T S V T E N E I  
 LVS L E K A K F E L E K Y Q R V G D L S K M A E L Q Y G K I P E L E A Q I K Q I E T E A E P S E N K L V R T S V T E N E I  
 SCHU-S4 L E K A K F E L E K Y Q R V G D L S K M A E L Q Y G K I P E L E A Q I K Q I E T E A E P S E N K L V R T S V T E N E I  
 E. coli L E Q A K I A I E Q A R R V G D L A R M S E L Q Y G K I P E L E K Q L E A . . A T Q L E G K T M R L L R N K V T D A E I  
 M. tuberculosis L E A L R G E S E R A E R D G D L A K A A E L R Y G R I P E V E K K L D A . A L P Q A Q A R E Q V M L K E E V G P D D I  
 P. aeruginosa I E Q A K Q E M E A A R R K G D L E S M A R I Q Y Q T I P D L E R S L Q M . . V D Q H G K T E N Q L L R N K V T D E I

*V. cholerae*

α13 α14 α15 α16 TT

540 550 560 570 580 590

*V. cholerae* A E V L S K Q T G I P V S K M L E A E K E K L L R M E D V L H K R V I G Q K E A V E V V A N A I R R S R A G L S D P N R  
 U112 A D V V S K A T G I P V S K M M E G E K D K L L N M E S F L H K R V I G Q D Q A I K A V S N A V R R S R S G L S D P N R  
 LVS A D V V S K A T G I P V S K M M E G E K D K L L N M E S F L H K R V I G Q D Q A I K A V S N A V R R S R S G L S D P N R  
 SCHU-S4 A D V V S K A T G I P V S K M M E G E K D K L L N M E S F L H K R V I G Q D Q A I K A V S N A V R R S R S G L S D P N R  
 E. coli A E V L A R W T G I P V S R M M S E R E K L L R M E Q E L H H R V I G Q N E A V D A V S N A I R R S R A G L A D P N R  
 M. tuberculosis A D V V S A W T G I P A G R L L E G E T A K L L R M E D E L G K R V I G Q K A A V T A V S D A V R R S R A G V S D P N R  
 P. aeruginosa A E V V S K W T G I P V S K M L E G E R E K L L R M E Q E L H R R V I G Q D E A G V A V S N A V R R S R A G L A D P N R

*V. cholerae*

β6 α17 β7 α18 TT

600 610 620 630 640 650

*V. cholerae* P I G S F L F L G P T G V G K T E L C K A L A N F L F D S E D A M V R V D M S E F M E K H S V A R L I V G A P P G Y V G Y  
 U112 P I G S F M F L G P T G V G K T E L T K A L A E F L F D D E D A M L R V D M S E F M E K H S V A R L I G A P P G Y V G Y  
 LVS P I G S F M F L G P T G V G K T E L T K A L A E F L F D D E D A M L R V D M S E F M E K H S V A R L I G A P P G Y V G Y  
 SCHU-S4 P I G S F M F L G P T G V G K T E L T K A L A E F L F D D E D A M L R V D M S E F M E K H S V A R L I G A P P G Y V G Y  
 E. coli P I G S F L F L G P T G V G K T E L C K A L A N F M F D S E A M V R I D M S E F M E K H S V R L V G A P P G Y V G Y  
 M. tuberculosis P T G A F M F L G P T G V G K T E L A K A L A D F L F D D E R A M V R I D M S E Y G E K H T V A R L I G A P P G Y V G Y  
 P. aeruginosa P S G S F L F L G P T G V G K T E L C K A L A E F L F D T E E A L V R I D M S E F M E K H S V A R L I G A P P G Y V G F

Walker A2

*V. cholerae*

α19 β8 η1 α20 β9 β10 β11

660 670 680 690 700 710

*V. cholerae* E E G G Y L T E A V R R K P Y S V I L L D E V E K A H P D V F N I L L Q V L D D G R L T D G Q G R T V D F R N T V V I M  
 U112 E Q G G Y L T E H V R R K P Y S V I L L D E V E K A H A D V F N I L L Q V L D D G R L T D G Q G R T V D F K N T V I V M  
 LVS E Q G G Y L T E H V R R K P Y S V I L L D E V E K A H A D I F N I L L Q V L D D G R L T D G Q G R T V D F K N T V I V M  
 SCHU-S4 E Q G G Y L T E H V R R K P Y S V I L L D E V E K A H A D I F N I L L Q V L D D G R L T D G Q G R T V D F K N T V I V M  
 E. coli E E G G Y L T E A V R R R P Y S V I L L D E V E K A H P D V F N I L L Q V L D D G R L T D G Q G R T V D F R N T V V I M  
 M. tuberculosis E A G G Q L T E A V R R R P Y T V V L F D E V E K A H P D V F D V L L Q V L D E G R L T D G H G R T V D F R N T I L I L  
 P. aeruginosa E E G G Y L T E A I R R K P Y S V V L L D E V E K A H P D V F N I L L Q V L E D G R L T D S H G R T V D F R N T V V V M

Walker B2

*V. cholerae*

α21 α22 α23 β12

720 730 740 750 760 770

*V. cholerae* T S N L G S S R I Q E N F A R L D Y Q G I K E Q V M D V V S K H F R P E F L N R V D E S V V F H P L G Q E H I K S I A S  
 U112 T S N L G S H R I Q E M Q G Q . D Y D T V K D A V M E M V L S H F R P E F V N R V D D A I V F E P L N K E M I T E I A K  
 LVS T S N L G S H R I Q E M Q G Q . D Y E T V K S A V M E M V L S H F R P E F V N R V D D A I V F E P L N K E M I T E I A K  
 SCHU-S4 T S N L G S H R I Q E M Q G Q . D Y E T V K S A V M E M V L S H F R P E F V N R V D D A I V F E P L N K E M I T E I A K  
 E. coli T S N L G S D L I Q E R F G E L D Y A H M K E L V L G V V S H N F R P E F T I N R I D E V V V F H P L G E Q H I A S I A Q  
 M. tuberculosis T S N L G S G G S A E . . . . . Q V L A A V R A T F K P E F I N R L D D V L I F E G L N P E L V R I V D  
 P. aeruginosa T S N L G S A Q I Q E L A G . . D R E A Q R A A V M D A V N A H F R P E F I N R I D E V V V F E P L A R Q I A G I A E

Arginine finger 2

*V. cholerae*

α24 β13 α25 α26

780 790 800 810 820 830

*V. cholerae* I Q L A R T R Q R L A E R D Y Q L E V D D E A L D L I A H V G F D P V V G A R P L K R A I Q N V N E P L A K S I L A G  
 U112 I Q I K R L E K R L A D L S I G L E V T T E A M D K L A D A G F D P V F G A R P L K R A I Q N N L E N P L A L K L L D G  
 LVS I Q I K R L E K R L A D L S I G L E V T T E A M D K L A D A G F D P V F G A R P L K R A I Q N N L E N P L A L K L L D G  
 SCHU-S4 I Q I K R L E K R L A D L S I G L E V T T E A M D K L A D A G F D P V F G A R P L K R A I Q N N L E N P L A L K L L D G  
 E. coli I Q L K R L Y K R L E E R G Y E I H I S D E A L K L L S E N G Y D P V V G A R P L K R A I Q Q Q I E N P L A Q Q I L L G  
 M. tuberculosis I Q L A Q L G K R L A Q R R L Q L Q V S L P A K R W L A Q R G F D P V V G A R P L R R L V Q Q A I G D Q L A K M L L A G  
 P. aeruginosa I Q L G R L R K R L A E R E L S L E L S Q E A L D K L I A V G F D P V V G A R P L K R A I Q R W I E N P L A Q L I L A G

|                       |         |    |    |            |        |            |            |
|-----------------------|---------|----|----|------------|--------|------------|------------|
|                       |         |    |    | $\beta 14$ |        | $\beta 15$ |            |
| <i>V.cholerae</i>     | TT      |    |    | →          |        | →          |            |
|                       | 840     |    |    | 850        |        |            |            |
| <i>V.cholerae</i>     | KFLPGSP | TL | LS | V          | KDGNIF | FA         | .SQ        |
| U112                  | EFKAEK  | I  | V  | D          | I      | DANNIT     | FSK        |
| LVS                   | EFKAEK  | I  | V  | D          | I      | DANNIT     | FSK        |
| SCHU-S4               | EFKAEK  | I  | V  | D          | I      | DANNIT     | FSK        |
| <i>E.coli</i>         | ELVPGKV | I  | R  | L          | E      | V          | NEDRIVA.VQ |
| <i>M.tuberculosis</i> | QVHDGDT | V  | P  | V          | N      | V          | SPDADSLILG |
| <i>P.aeruginosa</i>   | KFAPGAS | I  | S  | A          | K      | V          | EGDEIV..FA |
